# Supplementary material
Source: publisher site journal article supplement (http://edge.sagepub.com/sites/default/files/Martin%204e%2C%20Appendix%20E.pdf)
Supplement: Supplementary file 1 [file Martin%204e%2C%20Appendix%20E.pdf]

# Appendix E

## Two Thousand Years of Terror

- 1st century C.E.** ♦ Zealot rebels used a traditional dagger called a *sica* to dispatch enemies during their rebellion against Roman occupation.
- 60–61** ♦ A revolt against Roman rule in eastern Britain took place, killing 70,000 inhabitants. Roman reprisals were a campaign of terror.
- 11th century** ♦ The Assassin movement attempted to purge the Islamic faith and resist Crusader occupation in the Middle East by engaging in clandestine assassinations and attacks against opponents.
- July 1099** ♦ During the First Crusade, Christians of the Western Church entered Jerusalem. They massacred thousands of Muslim and Orthodox Christian residents.
- 13th century** ♦ During the Albigensian Crusade in southern France, legend holds that concerns were raised about loyal Catholics who were being killed. The pope's representative allegedly replied, "Kill them all, God will know his own."
- 1298–1303; 1336–1338** ♦ Anti-Jewish communal violence, known as the Rindfleisch and Armleder Massacres, occurred in central Europe.
- 13th–19th centuries** ♦ The Thuggee cult in India used a traditional noose called a *phansi* to strangle perhaps millions of victims in tribute to the goddess Kali, the destroyer.
- 14th–15th centuries** ♦ Christian Europeans conducted many massacres (pogroms) of Jews. Superstitious accusations were used to justify the pogroms.
- August 24, 1572** ♦ Catholic forces massacred thousands of French Huguenot Protestants in what became known as the St. Bartholomew's Day Massacre. It occurred during Counterreformation wars to suppress Protestant "heresies."
- 1604–1605** ♦ In England, Guy Fawkes hatched the Gunpowder Plot, intending to blow up Westminster palace. Unfortunately for Fawkes, the plot was discovered, and he and his coconspirators were tortured and executed.
- 1808–1814** ♦ The Spanish people fought a brutal war against French military occupation. The term *guerrilla*, or "little war," was coined to describe the tactics of the rebels.
- 1811–1816** ♦ The Luddites in England sabotaged and destroyed machinery in factories, which they believed were a cause of their unemployment and misery.
- 1865 or 1866** ♦ The Ku Klux Klan was founded in the United States in Pulaski, Tennessee, by former Confederate general Nathan Bedford Forrest and other upper-class Southerners.
- 1870s** ♦ The Molly Maguires, a secret organization of Irish coal miners in Pennsylvania, committed acts of sabotage and terrorism against mining companies.
- July 1879** ♦ In Russia, People's Will embarked on a campaign of terrorism and assassination, arguing that a violent intellectual elite could force government reforms.
- 1882–1968** ♦ Nearly 5,000 African Americans (mostly men) died when they were lynched by mobs or smaller groups of white Americans.
- About 1900** ♦ The Black Hundreds was founded in Russia. A right-wing nationalist group, the center of its ideology was strong and violent anti-Semitism.
- June 28, 1914** ♦ Gavrilo Princip, a student and member of the Serb terrorist organization Black Hand, assassinated Austrian Archduke Ferdinand and his wife in Sarajevo, Bosnia, thus igniting a series of political events leading to World War I.
- 1915** ♦ Ottoman Turkey committed genocide against its Armenian population. Approximately 1 million Armenians were killed.
- September 1920** ♦ A bomb was detonated on Wall Street in New York City. Thirty-five people were killed, and hundreds were injured.
- 1930s–1940s** ♦ During political purges, Soviet leader Joseph Stalin ordered the arrests and executions of thousands of party members and army officers.
- November 9, 1938** ♦ The German government planned and instigated anti-Jewish rioting in an evening that became known as *Kristallnacht* (the "Night of Glass").
- July 1941** ♦ German Einsatzgruppen began to systematically kill Russian Jews and other Soviet nationals.
- 1961–1996** ♦ Approximately 200,000 Guatemalans were killed or during a 35-year civil war that included state-sponsored massacres and activity by death squads.
- March 1965** ♦ Members of the United Klans of America shot to death Viola Liuzzo in Alabama and wounded a traveling companion.

- 1969–1986** ◆ Nearly 15,000 right- and left-wing terrorist attacks occurred in Italy.
- June 1969** ◆ Brazilian revolutionary Carlos Marighella completed the *Mini-Manual of the Urban Guerrilla*.
- October 1969** ◆ A bomb in Chicago destroyed a monument dedicated to the Chicago police. The leftist Weatherman group was responsible for the attack.
- September 1970** ◆ Jordanian troops drove the Palestine Liberation Organization out of Jordan in an operation that became known as Black September, the name later adopted by a Palestinian terrorist organization.
- 1971–1979** ◆ Idi Amin ruled Uganda with an iron fist. He was responsible for the forcible expulsion of Uganda's Indian and Pakistani merchant class, as well as the deaths of at least 100,000 and perhaps as many as 500,000 Ugandans.
- January 30, 1972** ◆ Elite British paratroopers fired on Irish Catholic demonstrators in Londonderry, Northern Ireland. The incident became known as Bloody Sunday. This was a seminal incident in the armed conflict waged by the Provisional Irish Republican Army.
- September 1972** ◆ Eight members of Black September captured nine Israeli athletes and killed two others at the Olympic Village during the Munich Olympics. Five terrorists and all nine athletes were killed during a rescue attempt by the Bavarian police.
- March 26, 2010** ◆ Hamas and Palestine Islamic Jihad claimed credit for killing two Israeli soldiers and wounding three others in Gaza. The soldiers were ambushed while intercepting men who were seen placing explosives near the Israeli border fence.
- April 9, 2010** ◆ In the Russian republic of Ingushetia, a female suicide bomber detonated herself near police officers, killing a district police commander. The attack was another in an ongoing anti-Russian terrorist campaign by a number of nationalist and religious extremist groups, many operating from the Caucasus region.
- May 1, 2010** ◆ Times Square in New York City was evacuated after the discovery of a car bomb.
- June 17, 2010** ◆ A 300-pound vehicular bomb was defused outside a police station in Aghnacloy, Northern Ireland.
- July 12, 2010** ◆ At least 70 people were killed and as many wounded when several suicide bombers attacked crowds watching the World Cup in Kampala, Uganda.
- July 27, 2010** ◆ Near Oman, a Japanese tanker was damaged by an explosion in the Strait of Hormuz. The Abdullah Azzam Brigades Islamist group took credit for the attack.
- September, 2010** ◆ It was reported that Al-Qaeda in Pakistan planned a series of attacks in Britain, France, and Germany. The alleged plan was broken up by intelligence agencies.
- October 4, 2010** ◆ The Real Irish Republican Army detonated a car bomb in Derry, Northern Ireland. The attack was part of an ongoing campaign by Republican splinter organizations.
- May 2, 2011** ◆ Al Qaeda founder Osama bin Laden was killed during a raid by U.S. Navy SEAL commandos in Abbottabad, Pakistan.
- June 8, 2011** ◆ Islamists killed two Buddhist monks and wounded five police officers in Thailand.
- July 22, 2011** ◆ In Oslo, Norway, right-wing extremist Anders Breivik detonated a bomb exploded outside the Norwegian Prime Minister's office and other government office buildings, and later youth members of the Labor Party on Utøya island.
- August 7, 2011** ◆ American Emerson Winfield Begolly from Pennsylvania was indicted on terror-related charges for allegedly using the Internet to encourage *jihadist* violence against Americans.
- October 4, 2011** ◆ A truck carrying drums of flammable liquid detonated at a checkpoint near a compound in Mogadishu, killing approximately 80 people. Students had gathered at the compound to sign up for scholarships funded by Turkey.
- November 1, 2011** ◆ Four men in Georgia were charged with conspiring on behalf of a domestic rightist militia group planned to attack government officials with explosives and ricin poison.
- November 5, 2011** ◆ In Colombia, FARC leader Alfonso Cano was killed.
- January 5, 2012** ◆ Boko Haram began a series of shootings in northeastern Nigeria, demanding that all Christians to leave. Hundreds of Christians evacuated the region shortly after the attacks.
- January 5, 2012** ◆ In Pakistan, sixteen captured soldiers were tortured and executed by the Islamist group Tehrik-e-Taliban.
- March 12, 2012** ◆ A gasoline bomb was thrown into a Shia mosque, killing the Imam.
- March 17, 2012** ◆ FARC rebels killed eleven members of the Colombian Army in an ambush.
- July 1, 2012** ◆ Al-Shabaab gunmen attacked Christians at two churches in the northern Kenya, killing and wounding dozens.
- September 11, 2012** ◆ Islamists attacked the American Embassy in Benghazi, Libya, killing the American ambassador and several others.
- November 2, 2012** ◆ In Davao, Philippines, guerrillas affiliated with the New People's Army killed four soldiers.
- April 14, 2013** ◆ In Mogadishu Somalia, Al-Shabaab terrorists wearing suicide vests bombed the Supreme Court building, killing and injuring nearly 100 people.
- April 15, 2013** ◆ In Boston Massachusetts, two bombs exploded near the finish line of the Boston Marathon.
- May 22, 2013** ◆ An off-duty soldier was knocked down by a truck and then attacked by Islamists wielding edged weapons in Woolwich, UK.
- July 6, 2013** ◆ Boko Haram militants assaulted the Government Secondary boarding school. More than 40 people were killed, most of them students. More than 100 were reported missing.

- January 14, 2014** ◆ In Maiduguri Nigeria, Boko Haram detonated a suicide car bomb at a checkpoint at the local market, killing and injuring more than 80 people.
- March 1, 2014** ◆ In Kungming China, a group of Uighur nationalists assaulted the main train station in with edged weapons, killing and injuring at least 140 travelers.
- April 14, 2014** ◆ Boko Haram kidnapped nearly 300 girls from a school in Chibok, Nigeria.
- May 24, 2014** ◆ The first known terrorist incident committed by a European jihadist returning from Syria occurred in Brussels Belgium. Mehdi Nemmouche opened fire inside the Jewish Museum, killing. He was arrested six days later in a train station in Marseilles and admitted to the attack.
- June 8, 2014** ◆ In Las Vegas Nevada, two racial supremacists shot to death two police officers as they ate lunch. Afterward they attacked shoppers at a nearby store, killing one, and then committed suicide.
- June 11, 2014** ◆ Boko Haram terrorists kidnapped approximately 30 girls in northeastern Nigeria.
- October 23, 2014** ◆ In Queens New York, an Islamist convert attacked four police officers with a hatchet.
- November 16, 2014** ◆ In Belfast Northern Ireland, rocket was fired at an armored police Land Rover.
- November 18, 2014** ◆ In Jerusalem Israel, two members of the Popular Front for the Liberation of Palestine attacked worshipers at a synagogue.
